# Supplementary material for: Uncoupling Lipid Synthesis from Adipocyte Development
Source: MDPI journal article supplement (doi:10.3390/biomedicines11041132), 2023-04-09
Supplement: s1 [file s1]

**A**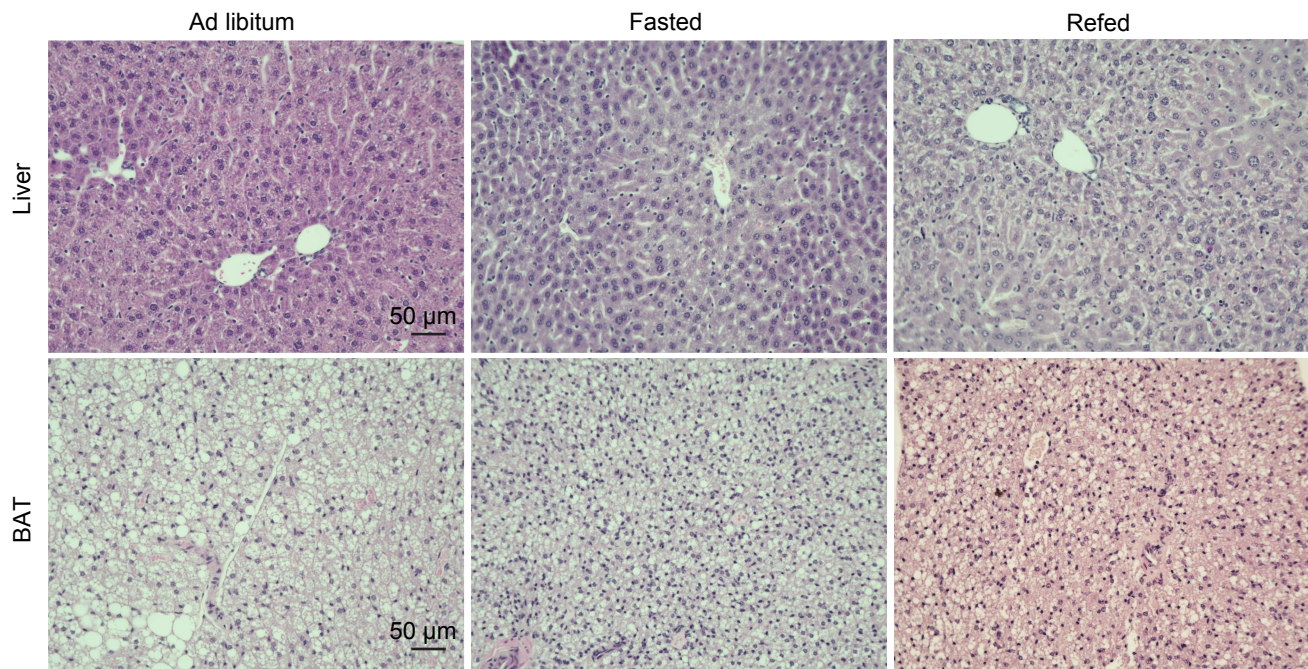**B**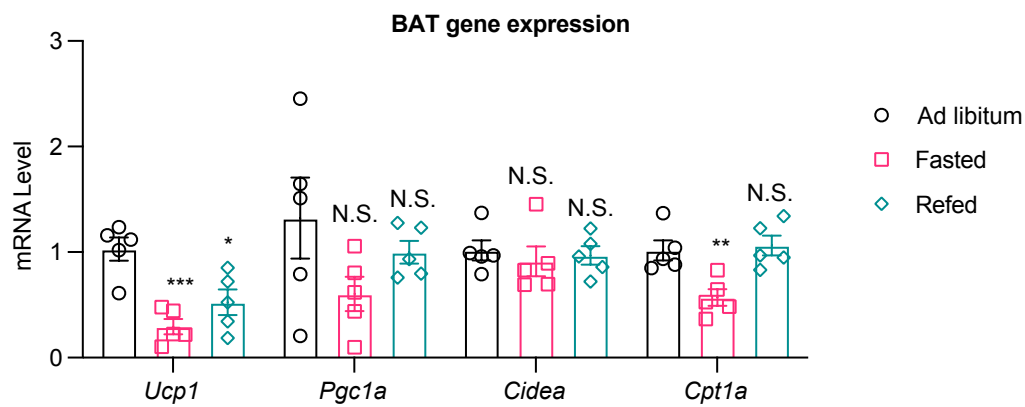

Supplementary Figure S1. Cell morphology of liver and Brown adipose tissue (BAT) did not change in response to prolonged fasting. A: H&E staining of BAT and liver from ad libitum fed, fasted mice or fast-ed-refed mice. B: qPCR analysis of gene expression of brown adipocyte markers in iWAT from ad libitum fed, fasted mice or fasted-refed mice. n=5/group. Data were represented as mean  $\pm$  SEM. Statistical significance is calculated via a two-tailed Student's t-test (Fasted or refed group versus Ad libitum group). N.S.: not significant, \*p < 0.05, \*\* p < 0.01, \*\*\* p < 0.001.

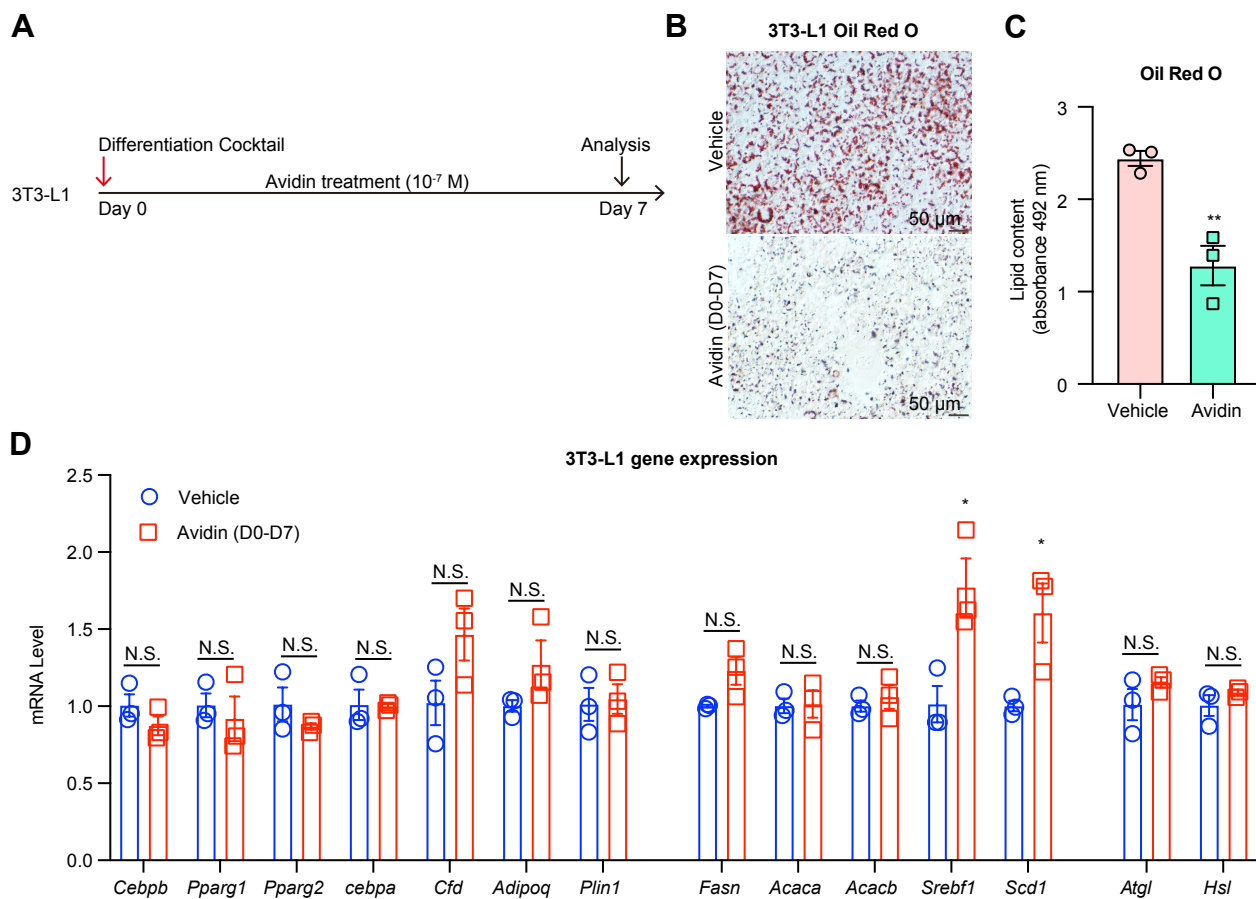

Supplementary Figure S2. Biotin deprivation in 3T3-L1 preadipocyte differentiation. A: Experimental design. 3T3-L1 preadipocytes were differentiated in the presence of  $10^{-7}$  M Avidin from Day 0 to Day 7 of differentiation. B: Oil Red O staining of lipid droplets in 3T3-L1 cells on Day 7 of differentiation. C: Quantification of Oil Red O staining. D: qPCR analysis of gene expression of adipogenic markers and lipogenic genes on Day 7 of differentiation with or without Avidin treatment. (n=3, 3). N.S.: not significant, \*  $p < 0.05$ , \*\*  $p < 0.01$ , for control vs. Avidin treatment group by 2-tailed Student's t-test. Data were represented as mean  $\pm$  SEM.

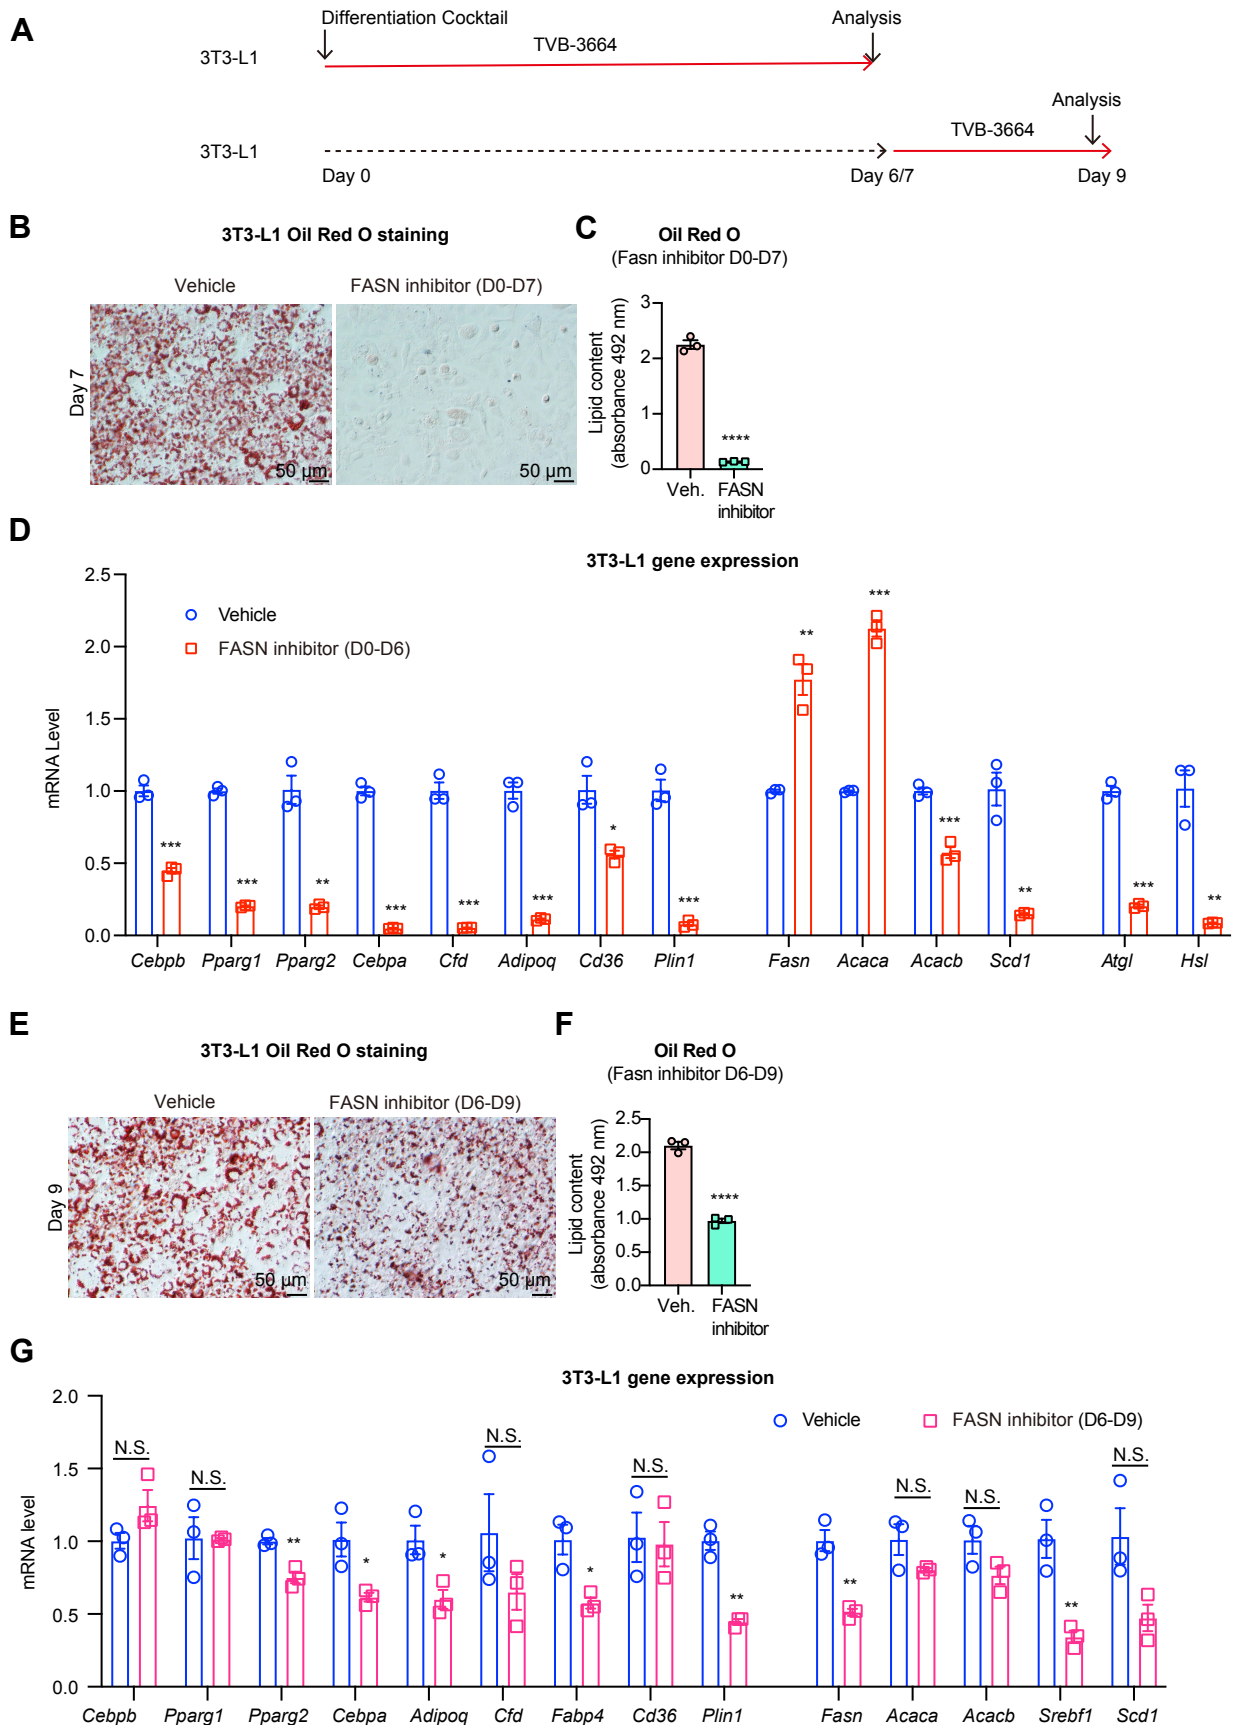

Supplementary Figure S3. Inhibition of FASN shows stage-dependent effect on 3T3-L1 adipogenesis. A: Experimental design. 3T3-L1 preadipocytes were treated with FASN inhibitor, TVB-3664 (200 nM) through differentiation Day 0 to Day 6/7, or mature 3T3-L1 cells were treated with FASN inhibitor from differentiation Day 6 to Day 9. B,C: Oil Red O staining of lipid droplets in 3T3-L1 cells (fixed on Day 7) with or without TVB-3664 treatment. D: Gene expression of adipogenic and lipogenic marker genes in 3T3-L1 cells treated with TVB-3664 at Day 0 to Day 6 during differentiation. E,F: Oil Red O staining of lipid droplets in 3T3-L1 cells (fixed on Day 9) with or without TVB-3664 treatment. G: Gene expression of adipogenic and lipogenic marker genes in 3T3-L1 cells treated with TVB-3664 at Day 6 to Day 9 during differentiation. n=3, 3. N.S.: not significant, \* p < 0.05, \*\* p < 0.01, \*\*\* p < 0.001 for control vs. TVB-3664 treatment group by 2-tailed Student's t-test. Data were represented as mean ± SEM.

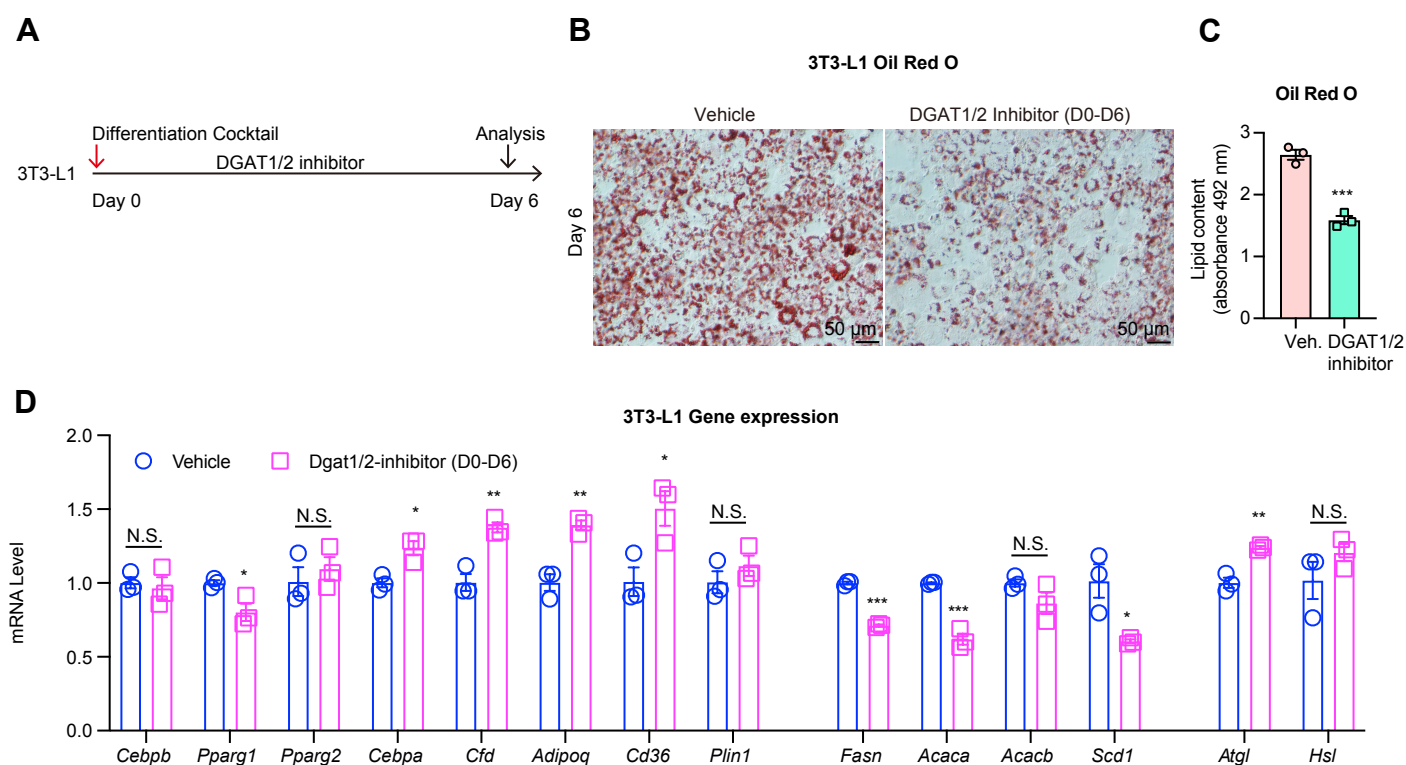

Supplementary Figure S4. Inhibiting TG synthesis does not block 3T3-L1 adipocyte differentiation despite preventing lipid droplet accumulation. A: Experimental design. 3T3-L1 preadipocytes were differentiated in the presence of DGAT1 inhibitor (PF-04620110, 3  $\mu$ M) and DGAT2 inhibitor (PF-06427878, 3  $\mu$ M) from Day 0 to Day 6. B,C: Oil Red O staining of lipid droplets in 3T3-L1 cells on Day 6 of differentiation. D: qPCR analysis of gene expression of adipogenic, lipogenic and lipolytic marker genes on Day 6 of differentiation. n=3, 3. N.S.: not significant, \*  $p < 0.05$ , \*\*  $p < 0.01$ , \*\*\*  $p < 0.001$  for control vs. DGAT1/2 inhibitor treatment group by 2-tailed Student's t-test. Data were represented as mean  $\pm$  SEM.

**Supplementary Table S1. List of primers used in QPCR.**

| <b>Primer name</b> | <b>Primer sequence</b>      |
|--------------------|-----------------------------|
| Adipsin-F          | CATGCTCGGCCCTACATGG         |
| Adipsin-R          | CACAGAGTCGTCATCCGTCAC       |
| Perilipin 1-F      | GGCCTGGACGACAAAACC          |
| Perilipin 1-R      | CAGGATGGGCTCCATGAC          |
| Scd1-F             | CATCATTCTCATGGTCCTGCT       |
| Scd1-R             | CCCAGTCGTACACGTCATTTT       |
| Fasn-F             | CTGACTCGGCTACTGACACG        |
| Fasn-R             | TGAGCTGGGTTAGGGTAGGA        |
| Cd36-F             | TCCAGCCAATGCCTTTGC          |
| Cd36-R             | TGGAGAATTACTTTTTTCAGTGCAGAA |
| Srebf1-F           | GAAGCTGTCGGGGTAGCGTCT       |
| Srebf1-R           | CTCTCAGGAGAGTTGGCACCTG      |
| Acaca-F            | ACACCATGTTGGGAGTTGTG        |
| Acaca-R            | GCTGTTCCCTCAGGCTCACAT       |
| Acacb-F            | CATGGTAGTGGCTTTGAAGGA       |
| Acacb-R            | CGTGTCGATATCGTTGTTCTG       |
| Pparg2-F           | TCTGGGAGATTCTCCTGTTGA       |
| Pparg2-R           | GGTGGGCCAGAATGGCATCT        |
| Pparg1-F           | AGAAGCGGTGAACCACTGAT        |
| Pparg1-R           | GAATGCGAGTGGTCTTCCAT        |
| Cebpa-F            | GGACAAGAACAGCAACGAGTA       |
| Cebpa-R            | GCAGTTGCCATGGCCTTGA         |
| Cebpb-F            | CAAGCTGAGCGACGAGTACA        |
| Cebpb-R            | CAGCTGCTCCACCTTCTTCT        |
| Fabp4-F            | AAGTGGGAGTGGGCTTTGC         |
| Fabp4-R            | CCGGATGGTGACCAAATCC         |
| Adiponectin-F      | GCACTGGCAAGTTCTACTGCAA      |
| Adiponectin-R      | GTAGGTGAAGAGAACGGCCTTGT     |
| Dgat2-F            | AGTGGCAATGCTATCATCATCGT     |
| Dgat2-R            | TCTTCTGGACCCATCGGCCCCAGGA   |
| Agpat2-F           | GCAACGACAATGGGGACCTG        |
| Agpat2-R           | ACAGCATCCAGCACTTGTACC       |
| Gpat3-F            | GGAGGATGAAGTGACCCAGA        |

|                 |                          |
|-----------------|--------------------------|
| Gpat3-R         | CCAGTTTTTGAGGCTGCTGT     |
| Ucp1-F          | ACTGCCACACCTCCAGTCATT    |
| Ucp1-R          | CTTTGCCTCACTCAGGATTGG    |
| Atgl-F          | AACACCAGCATCCAGTTCAA     |
| Atgl-R          | GGTTCAGTAGGCCATTCCTC     |
| Cidea-F         | TGCTCTTCTGTATCGCCCAGT    |
| Cidea-R         | GCCGTGTTAAGGAATCTGCTG    |
| Cpt1a-F         | TGCACTACGGAGTCCTGCAA     |
| Cpt1a-R         | GGACAACCTCCATGGCTCAG     |
| Hsl-F           | ACCGAGACAGGCCTCAGTGTG    |
| Hsl-F           | GAATCGGCCACCGGTAAAGAG    |
| Cyclophilin A-F | TATCTGCACTGCCAAGACTGAGTG |
| Cyclophilin A-R | CTTCTTGCTGGTCTTGCCATTCC  |
| Rpl23-F         | CTGTGAAGGGAATCAAGGGA     |
| Rpl23-R         | TGTCGAATTACCACTGCTGG     |
